# Supplementary material for: LINC00885 a Novel Oncogenic Long Non-Coding RNA Associated with Early Stage Breast Cancer Progression
Source: MDPI journal article supplement (doi:10.3390/ijms21197407), 2020-10-08
Supplement: s1 [file s1]

**Supplementary Data 2.** List of primers employed in RT-qPCR analysis.

| <b>Gene</b>      | <b>Forward 5' &gt; 3'</b> | <b>Reverse 5' &gt; 3'</b> | <b>Amplicon</b> |
|------------------|---------------------------|---------------------------|-----------------|
| <i>LINC00885</i> | CCAGCAGGGCCTAGTAACAC      | CCTTGCTCTTGGTGAGTGGT      | 172             |
| <i>MTRNR1</i>    | ACACATGCAAGCATCCC         | GGCTGGCACGAAATTGA         | 205             |
| <i>MALAT1</i>    | CACCGAAGGCTTAAAGTAGGAC    | GCTGACACTTCTCTTGACCTTAG   | 93              |
| <i>EREG</i>      | CCCAGGAGAGTCCAGTGATA      | AAGGTTGGTGGACGGTTAAA      | 221             |
| <i>AREG</i>      | GCTGCCTTTATGTCTGCTGTGA    | TGGAAAGAGGACCGACTCATC     | 226             |
| <i>CMYC</i>      | CACCAGCGACTCTGA           | GATCCAGACTCTGACCTTTTG     | 102             |
| <i>CCND1</i>     | GGATGGAGTTGTCGGTGTAGATG   | AGGAACAGAAGTGCGAGGAGG     | 192             |
| <i>GAPDH</i>     | ACAACTTTGGTATCGTGGAAGG    | GCCATCACGCCACAGTTTC       | 294             |
| <i>RNA18S</i>    | GTAACCCGTTGAACCCCAT       | CCATCCAATCGGTAGTAGCG      | 151             |
